# Supplementary material for: Evaluation of multi-target iridium(iii)-based metallodrugs in combating antimicrobial resistance and infections caused by Staphylococcus aureus
Source: Royal Society of Chemistry journal article supplement (doi:10.1039/d4ra02152e), 2024-01-01
Supplement: d4ra02152e1.pdf [file d4ra02152e1.pdf]

# **Evaluation of Iridium(III)-based Metallodrugs with multi-target in antimicrobial resistance combat and infection therapy caused by *Staphylococcus aureus***

Shijie Lin<sup>a§</sup>, Yushou Chen<sup>b§</sup>, Yajuan Sun<sup>b§</sup>, Guangying Yu<sup>b</sup>, Xiangwen Liao<sup>b</sup>, Qiang Yang<sup>c\*</sup>

<sup>a</sup> Department of Pharmacy, Hainan General Hospital (Hainan Affiliated Hospital of Hainan Medical University), Haikou, 570311, China

<sup>b</sup> Jiangxi Provincial Key Laboratory of Drug Design and Evaluation, School of Pharmacy, Jiangxi Science & Technology Normal University, Nanchang, 330013, China

<sup>c</sup> Department of Clinical Pharmacy, Hainan Cancer Hospital, Haikou, 570100, China

§ These authors contribute equally to this work

\* Correspondence author:

Qiang Yang, E-mail: [18789551643@163.com](mailto:18789551643@163.com)

## Supplementary Materials

**Ligands L1–L3:** The synthesis of L1, L2, L3 were identical with the procedure as described previously<sup>[1-3]</sup>.

**Complex Ir1, Ir2 and Ir3:** The synthesis of **Ir1**, **Ir2**, **Ir3** were identical with the procedure as described previously<sup>[4-6]</sup>. Briefly, **Ir1**, **Ir2**, **Ir3** (0.4 mmol, 2 equiv) and [Ir(ppy)<sub>2</sub>Cl]<sub>2</sub> (0.2 mmol, 1 equiv) in CH<sub>2</sub>Cl<sub>2</sub>/CH<sub>3</sub>OH (2:1, v/v) was heated to refluxed 65 °C for 8 h under N<sub>2</sub> atmosphere. After the resulting red solution cooled to room temperature, saturated KPF<sub>6</sub> aqueous solution (10 mL) were added to obtain a red precipitate. The mixture was filtered to remove insoluble salts, and then the filtrate was evaporated to dryness under reduced pressure to get the crude product. The crude product was then dissolved with a small amount of CH<sub>2</sub>Cl<sub>2</sub> and purified by column chromatography with CH<sub>2</sub>Cl<sub>2</sub>/CH<sub>3</sub>OH (10:1, v/v) as the eluent. It was obtained as a yellow powder. **Ir1:** yield: 73.0 %. <sup>1</sup>H NMR (400 MHz, DMSO-*d*<sub>6</sub>) δ 9.11 (d, *J* = 8.0 Hz, 2H), 8.78 (s, 1H), 8.27 (d, *J* = 8.2 Hz, 2H), 8.15 (d, *J* = 5.0 Hz, 2H), 8.07 (dd, *J* = 8.2, 5.2 Hz, 2H), 7.96 (d, *J* = 7.8 Hz, 2H), 7.87 (t, *J* = 7.8 Hz, 2H), 7.49 (d, *J* = 5.7 Hz, 2H), 7.06 (t, *J* = 7.4 Hz, 2H), 6.96 (q, *J* = 7.2 Hz, 4H), 6.29 (d, *J* = 7.5 Hz, 2H). <sup>13</sup>C NMR (101 MHz, DMSO-*d*<sub>6</sub>) δ 166.80 (s), 150.22 (s), 149.04 (s), 148.26 (s), 144.00 (d, *J* = 14.4 Hz), 142.99 (s), 138.55 (s), 132.03 (s), 131.14 (s), 130.14 (s), 127.01 (s), 124.95 (s), 123.70 (s), 122.25 (s), 119.84 (s). HRMS (ESI) *m/z*: calcd for C<sub>35</sub>H<sub>24</sub>N<sub>6</sub>Ir [M-PF<sub>6</sub>]<sup>+</sup>, 721.1693; found 721.1721. **Ir2:** yield: 75.0 %. <sup>1</sup>H NMR (400 MHz, DMSO-*d*<sub>6</sub>) δ 14.36 (s, 1H), 9.20 (d, *J* = 8.2 Hz, 2H), 8.30 (dd, *J* = 15.4, 8.2 Hz, 4H), 8.17 (d, *J* = 4.7 Hz, 2H), 8.13 – 8.06 (m, 2H), 7.97 (d, *J* = 7.9 Hz, 2H), 7.89 (t, *J* = 7.8 Hz, 2H), 7.67 (t, *J* = 7.7 Hz, 2H), 7.60 (t, *J* = 7.4 Hz, 1H), 7.52 (d, *J* = 5.6 Hz, 2H), 7.07 (t, *J* = 7.5 Hz, 2H), 6.98 (dt, *J* = 14.7, 7.3 Hz, 4H), 6.30 (d, *J* = 7.5 Hz, 2H). <sup>13</sup>C NMR (101 MHz, DMSO-*d*<sub>6</sub>) δ 166.83 (s), 152.70 (s), 150.22 (s), 149.04 (s),

148.31 (s), 144.01 (d,  $J = 14.6$  Hz), 138.57 (s), 132.11 (s), 131.13 (s), 130.23 (d,  $J = 15.3$  Hz), 129.45 (d,  $J = 11.7$  Hz), 129.26 (d,  $J = 25.7$  Hz), 126.95 (s), 126.51 (s), 124.95 (s), 123.71 (s), 122.26 (s), 119.85 (s). HRMS (ESI)  $m/z$ : calcd for  $C_{41}H_{28}N_6Ir$   $[M-PF_6]^+$ , 797.2007; found 797.2009. **Ir3**: yield: 76.0 %.  $^1H$  NMR (400 MHz,  $DMSO-d_6$ )  $\delta$  10.15 (s, 1H), 9.18 (d,  $J = 8.3$  Hz, 2H), 8.27 (d,  $J = 8.2$  Hz, 2H), 8.15 (dd,  $J = 9.3$ , 7.0 Hz, 4H), 8.07 (dd,  $J = 8.1$ , 5.3 Hz, 2H), 7.96 (d,  $J = 7.9$  Hz, 2H), 7.88 (t,  $J = 7.8$  Hz, 2H), 7.50 (d,  $J = 5.7$  Hz, 2H), 7.06 (t,  $J = 7.5$  Hz, 2H), 6.98 (dt,  $J = 14.6$ , 7.6 Hz, 6H), 6.29 (d,  $J = 7.5$  Hz, 2H).  $^{13}C$  NMR (101 MHz,  $DMSO-d_6$ )  $\delta$  166.85 (s), 159.55 (s), 153.44 (s), 150.35 (s), 149.04 (s), 148.03 (s), 143.86 (d,  $J = 20.0$  Hz), 143.60 – 142.14 (m), 138.58 (s), 132.08 (s), 131.16 (s), 130.17 (s), 128.36 (s), 126.78 (s), 124.97 (s), 123.74 (s), 122.26 (s), 120.44 (s), 119.87 (s), 115.87 (s). HRMS (ESI)  $m/z$ : calcd for  $C_{41}H_{28}N_6IrO$   $[M-PF_6]^+$ , 813.1956; found 813.1974.

### <sup>1</sup>H NMR of Ir1

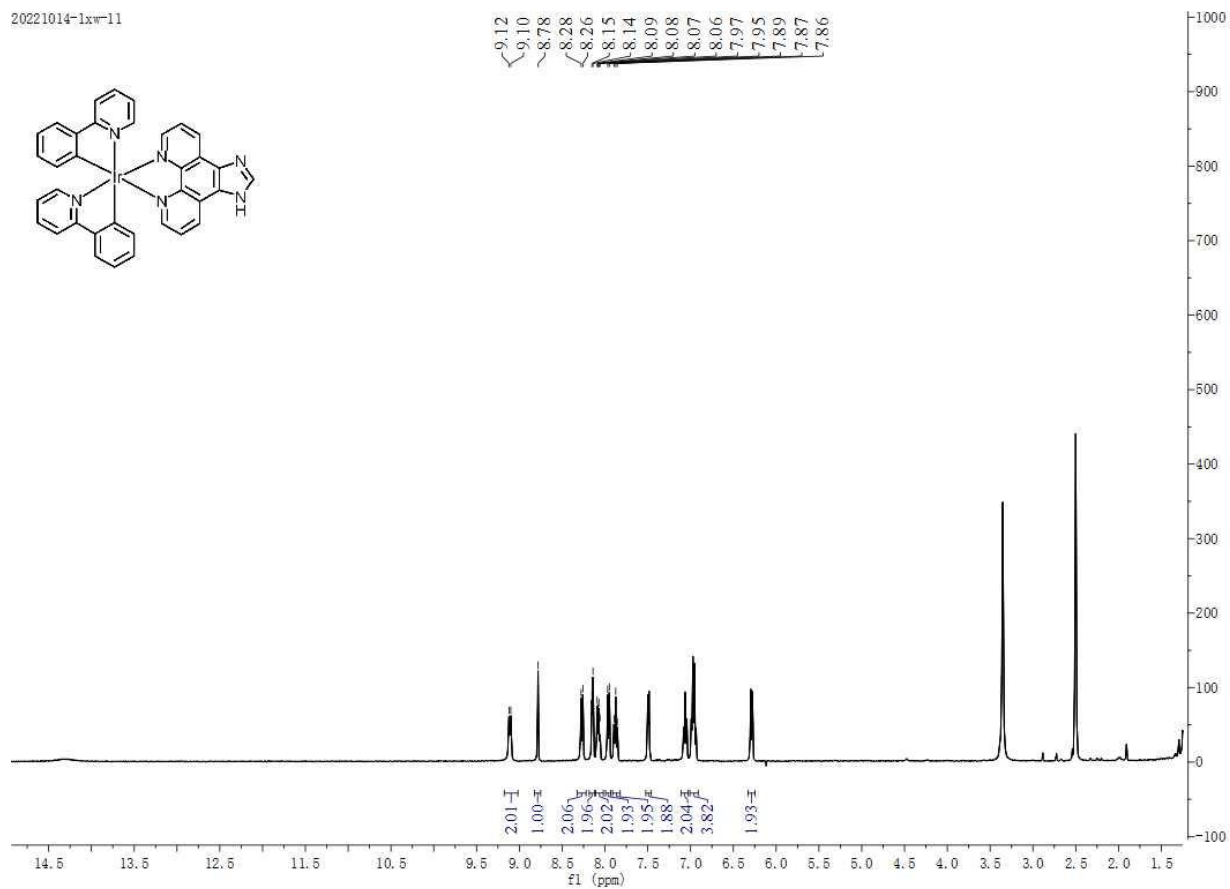

20221117-1xw-1-c-

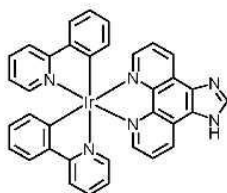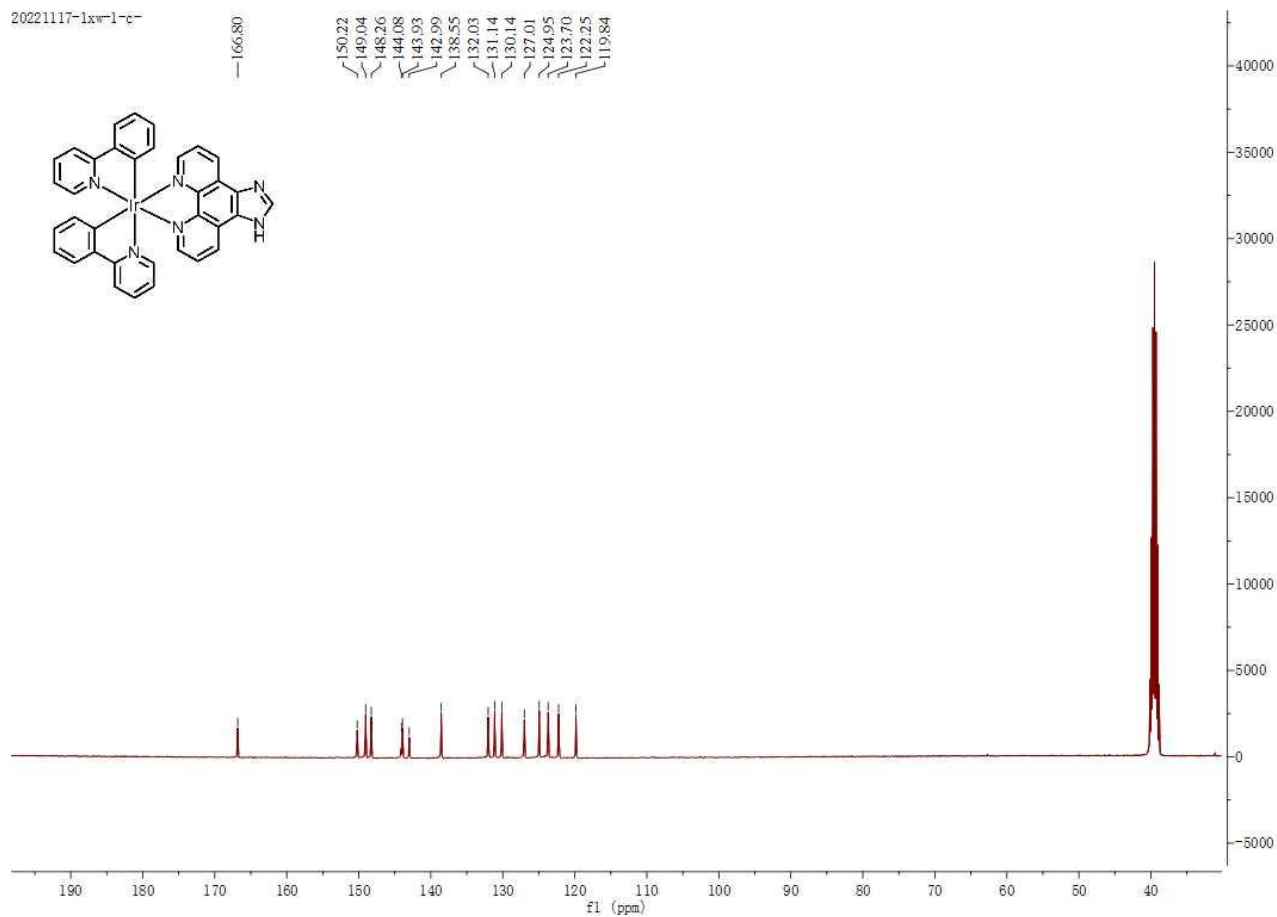

# HRMS of Ir1

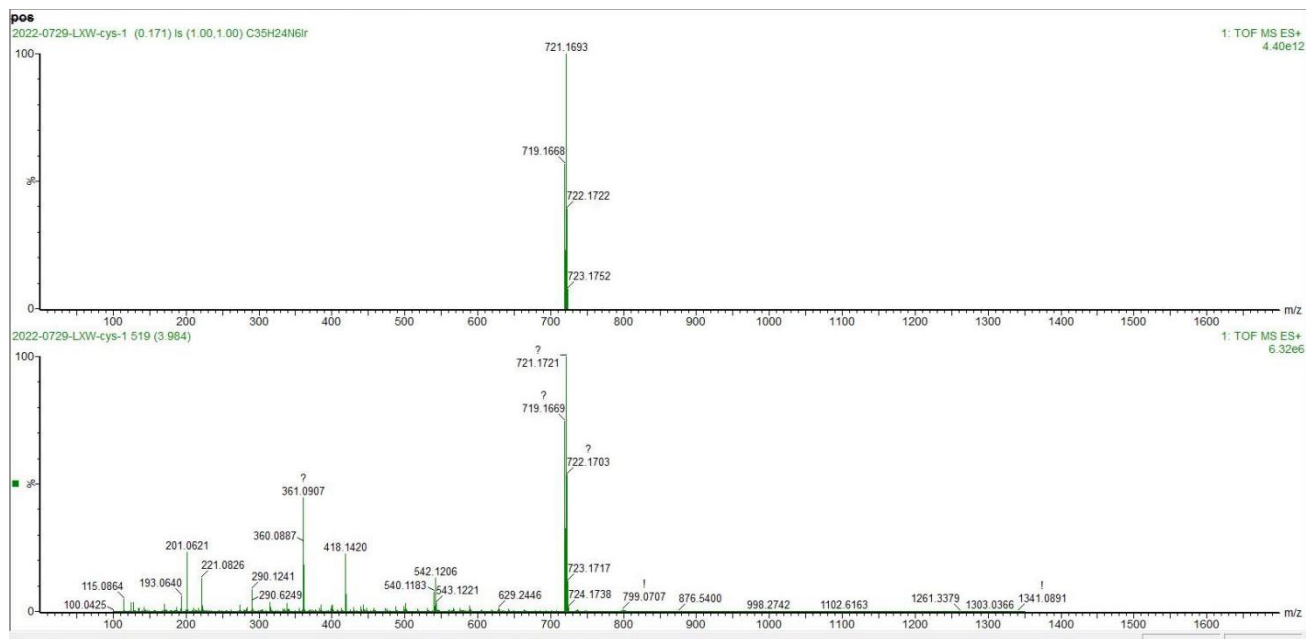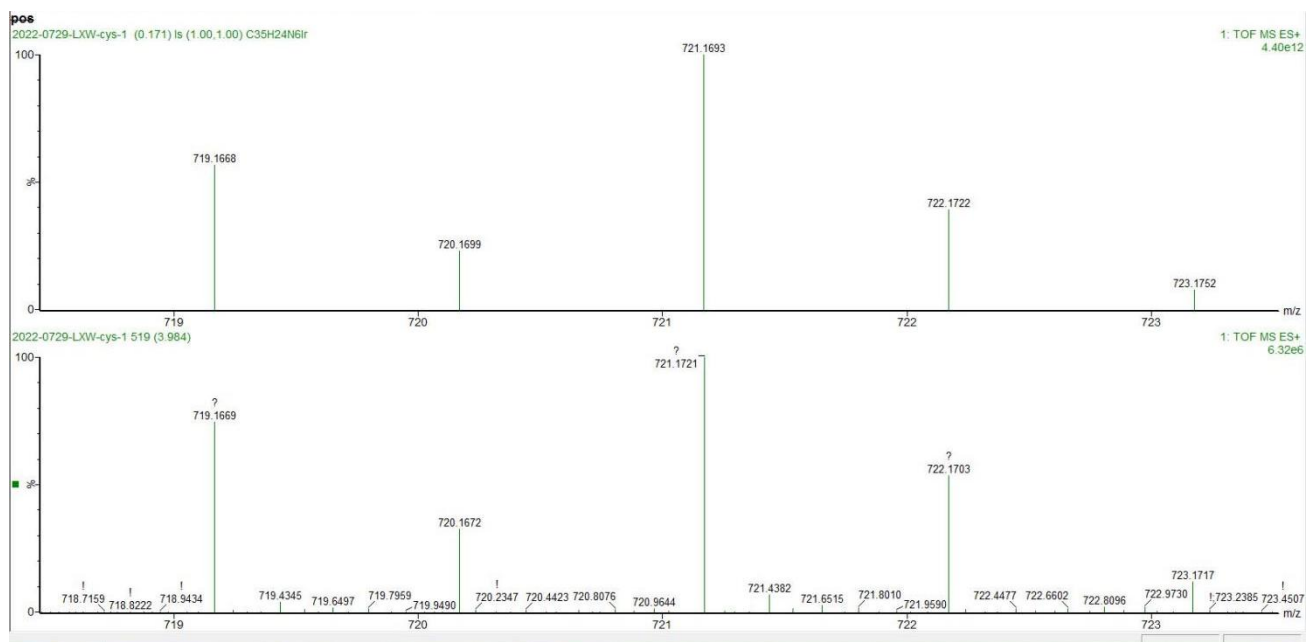

## HPLC of Ir1

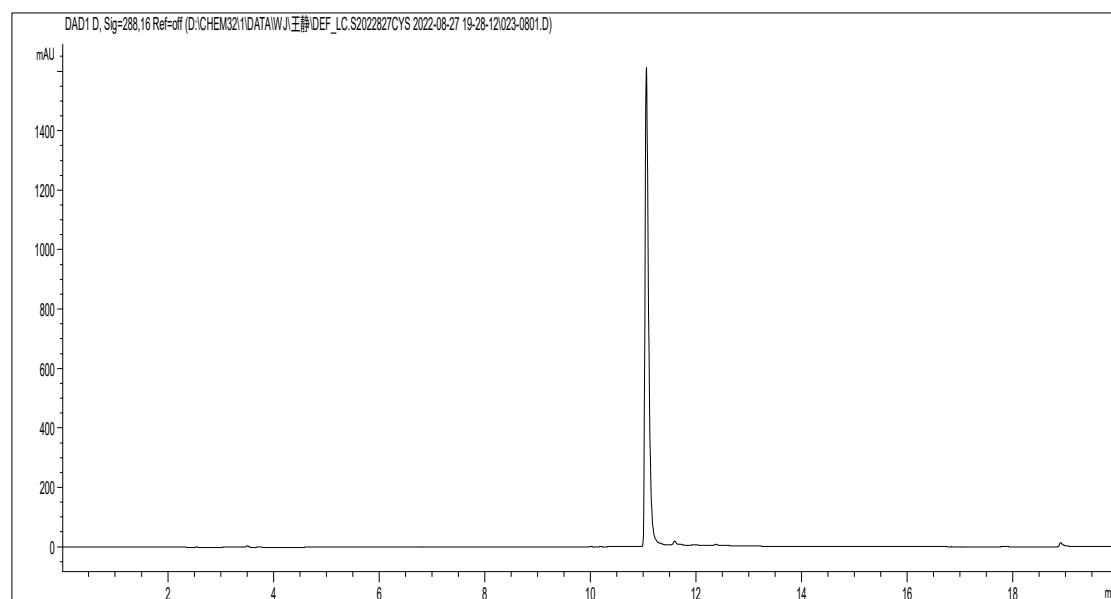

# <sup>1</sup>H NMR of Ir2

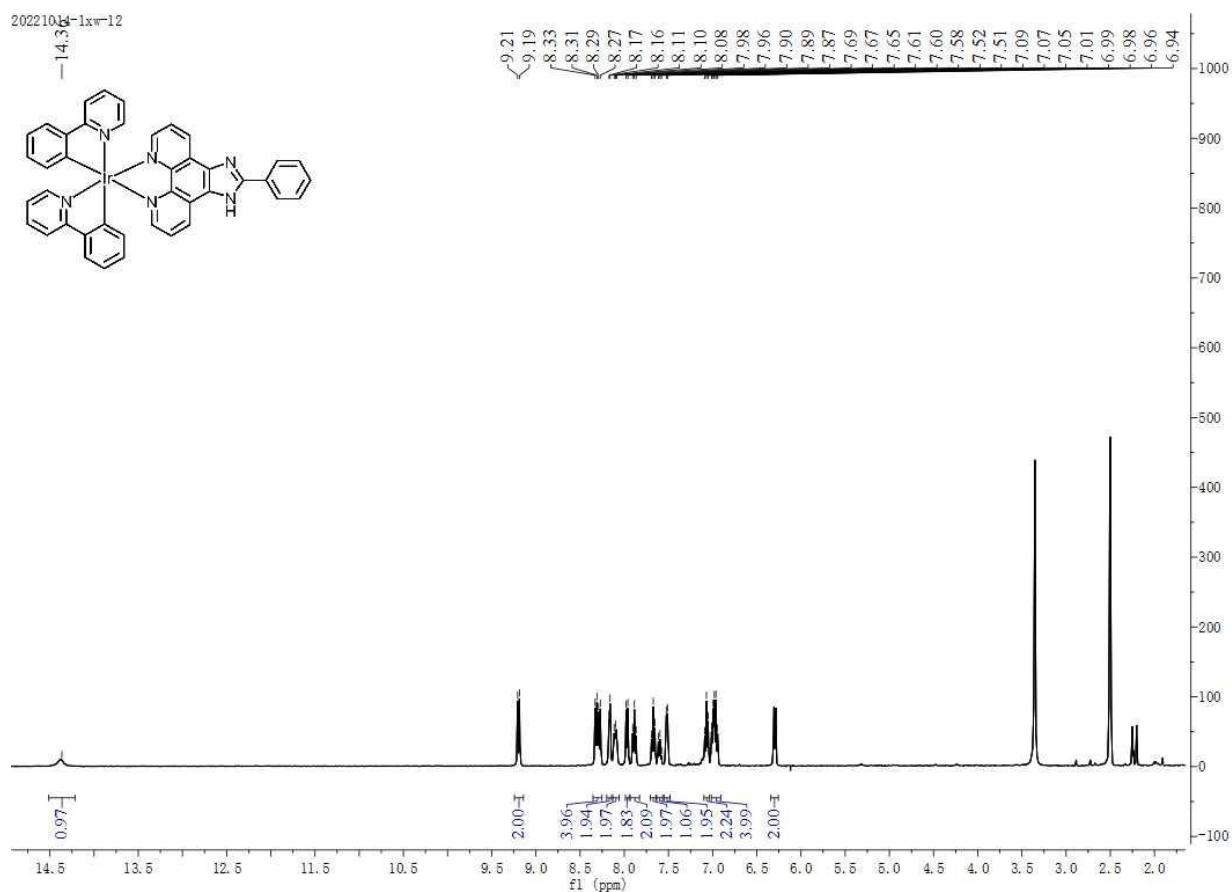

# <sup>13</sup>C NMR of Ir2

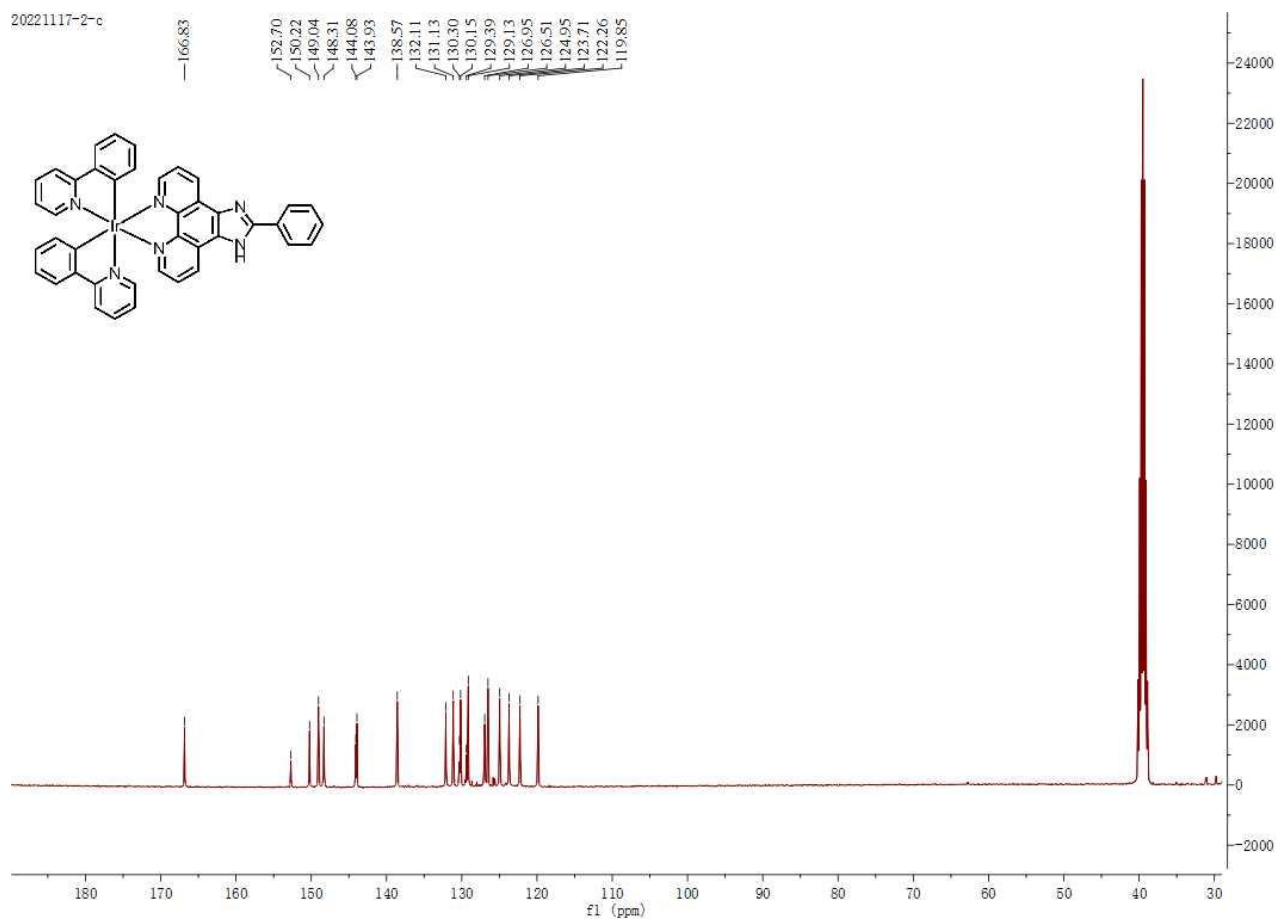

# HRMS of Ir2

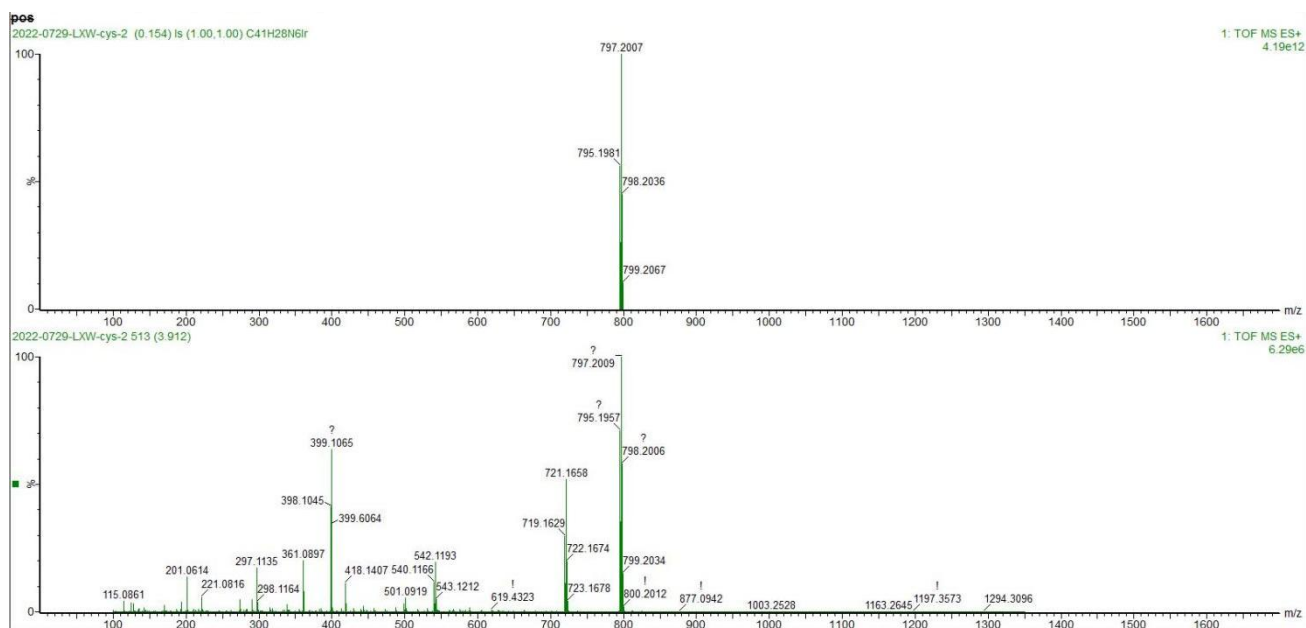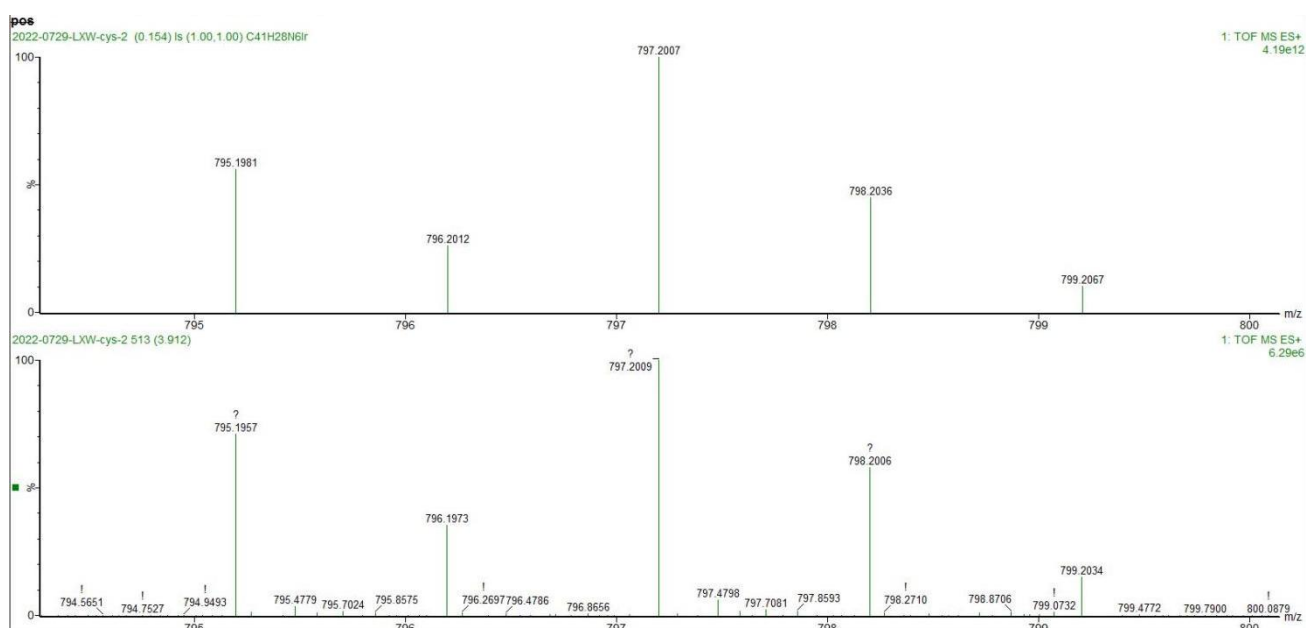

## HPLC of Ir2

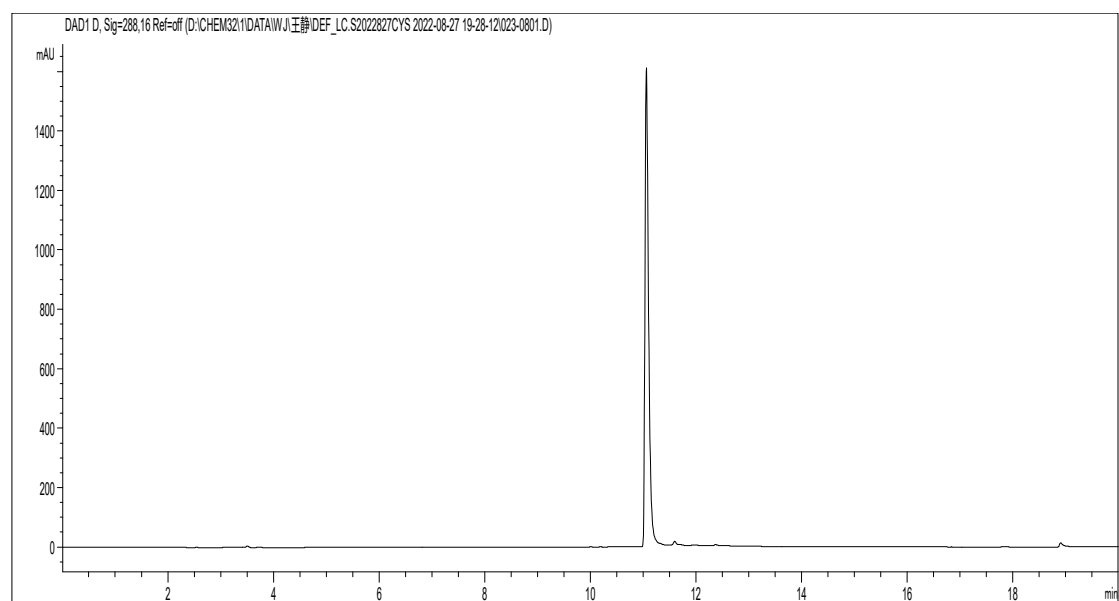

### <sup>1</sup>H NMR of Ir3

20221014-1xw-14

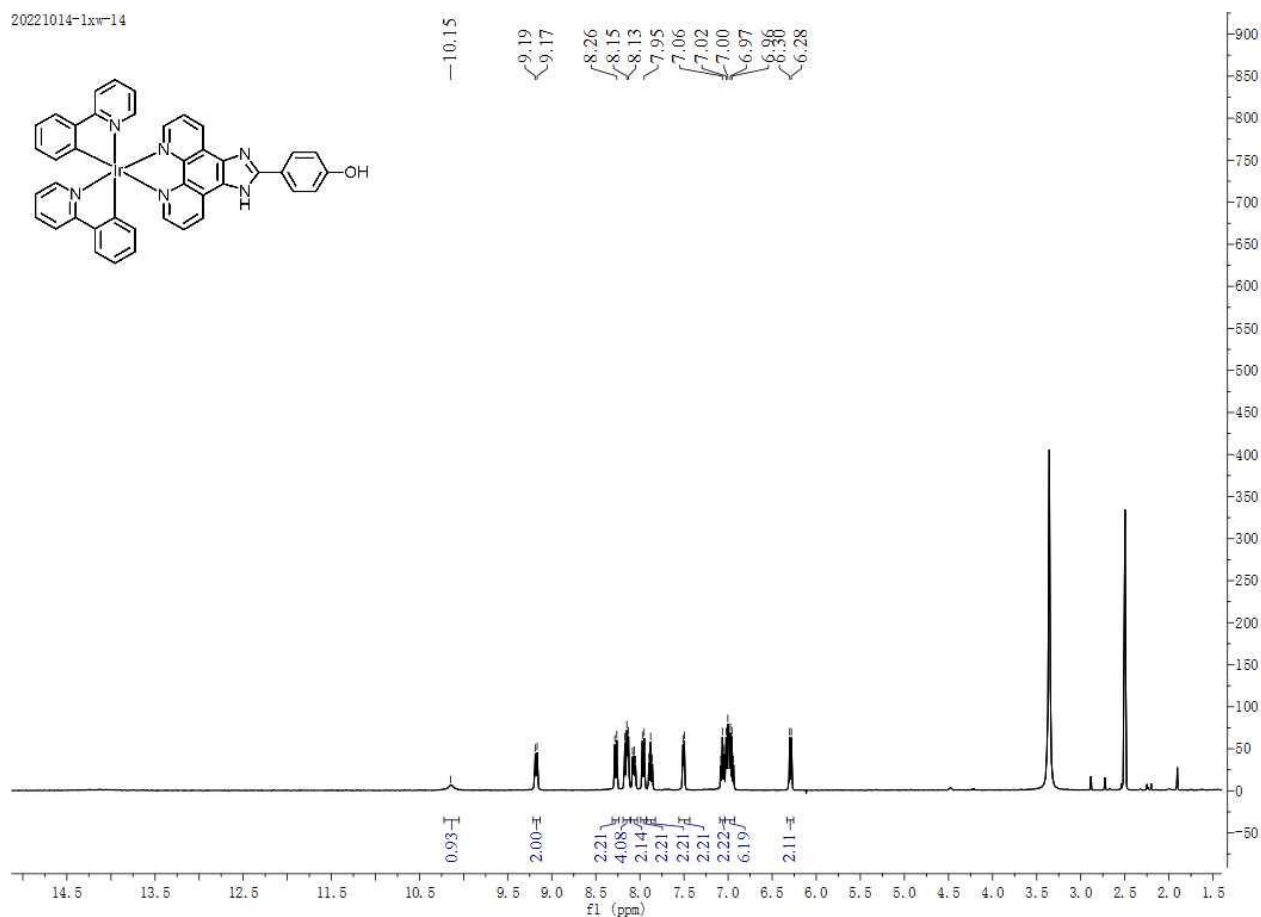

### <sup>1</sup>H NMR of Ir3

20221125-1xw-4-c

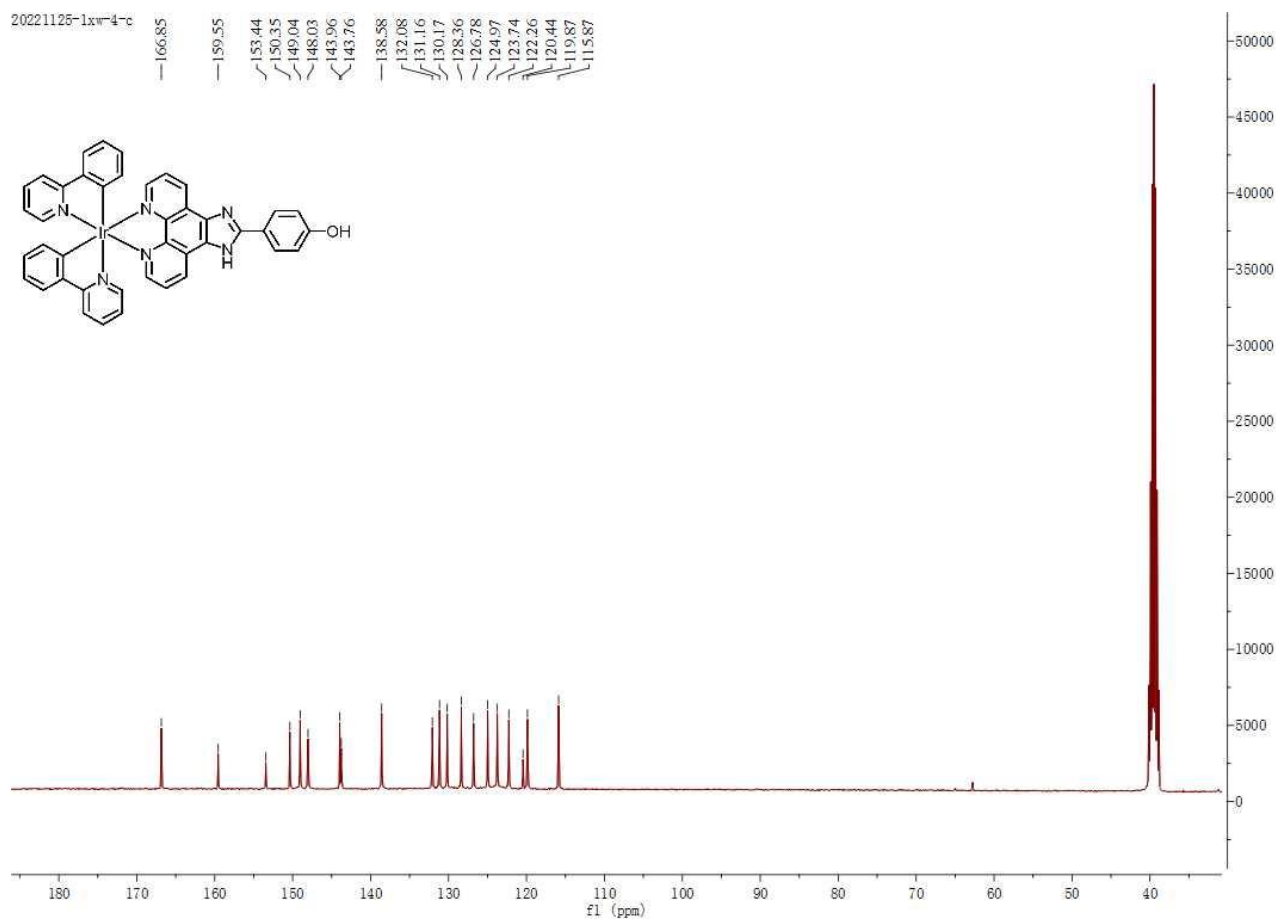

HRMS of Ir3

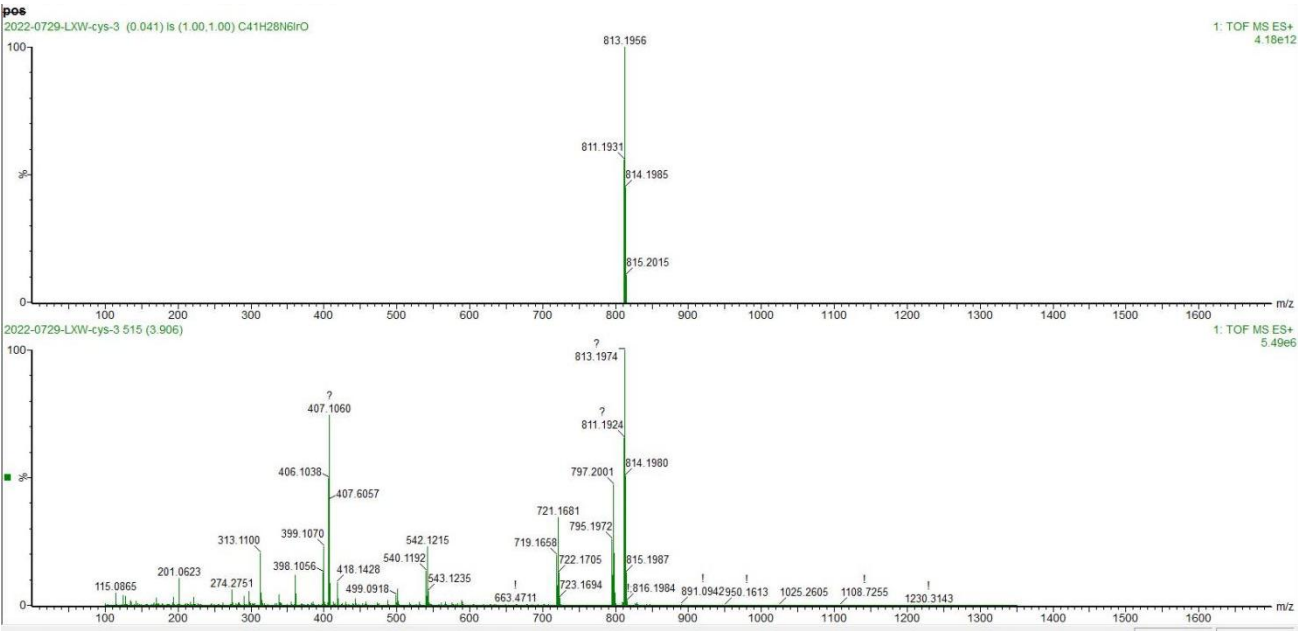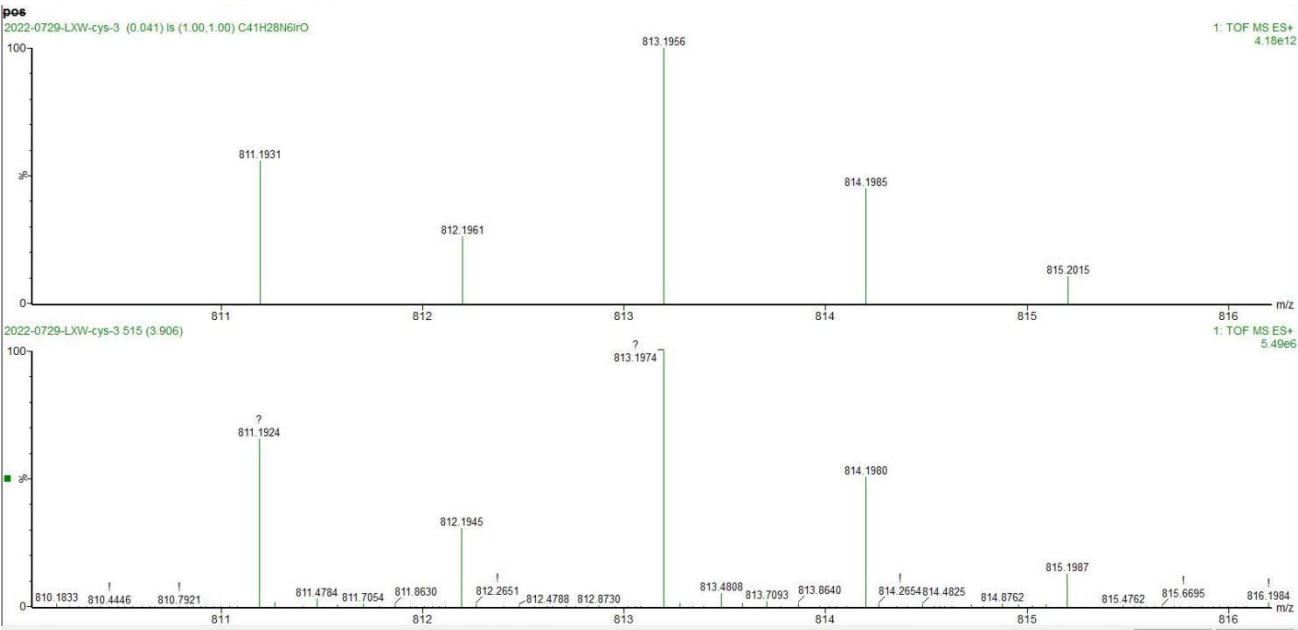

## HPLC of Ir3

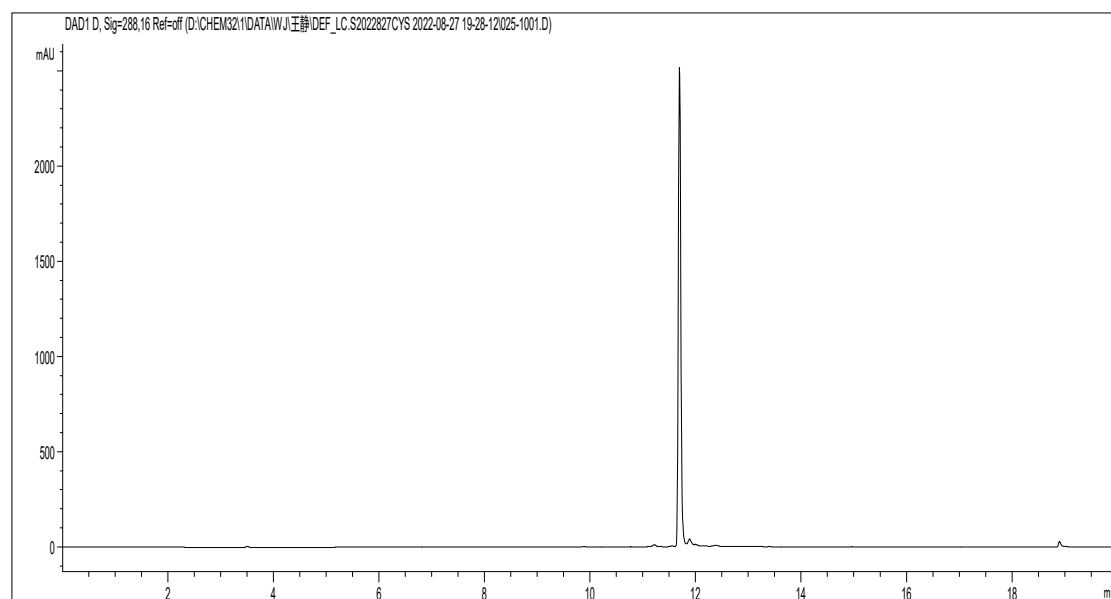

**Table S1.** Minimum inhibitory concentration (MIC) values of **Ir3** against drug-resistant *S. aureus* (MRSA) isolated from the clinic.

| Compound         | MIC $\mu\text{g/mL}$ |
|------------------|----------------------|
| <b>Ir3</b>       | 3.9                  |
| Oxacillin        | Resistance           |
| Benzylpenicillin | Resistance           |

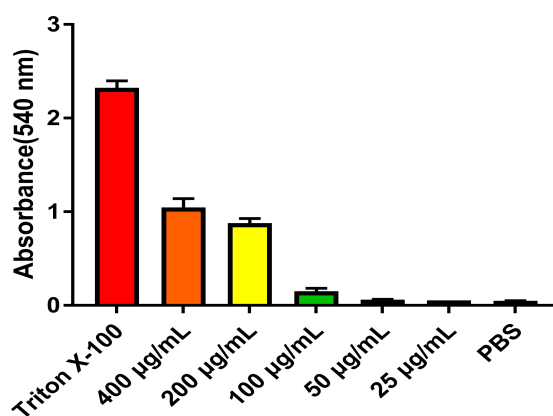

**Figure S1.** The hemolytic activities of Ir3 towards rabbit erythrocytes; the results are shown as mean  $\pm$  sd.

- [1] A. Pinto, M. Echeverri, B. Gomez-Lor, L. Rodriguez, Highly emissive supramolecular gold(I)-BTD materials, *Dalton Trans*, 51 (2022) 8340-8349.
- [2] S. De, R. Selva Kumar, A. Gauthaman, S.K. Ashok Kumar, P. Paira, A. Moorthy, S. Banerjee, Luminescent ruthenium(II)-para-cymene complexes of aryl substituted imidazo-1,10-phenanthroline as anticancer agents and the effect of remote substituents on cytotoxic activities, *Inorganica Chimica Acta*, 515 (2021).
- [3] F.L. Xie, Z.T. Huang, L. Bai, J.W. Zhu, H.H. Xu, Q.Q. Long, Q.F. Guo, Y. Wu, S.H. Liu, Antitumor activity studies of iridium (III) polypyridine complexes-loaded liposomes against gastric tumor cell in vitro, *J Inorg Biochem*, 225 (2021) 111603.
- [4] W.Y. Zhang, F. Du, M. He, L. Bai, Y.Y. Gu, L.L. Yang, Y.J. Liu, Studies of anticancer activity in vitro and in vivo of iridium(III) polypyridyl complexes-loaded liposomes as drug delivery system, *Eur J Med Chem*, 178 (2019) 390-400.
- [5] J. Q. Wang, X. J. Hou, H. B. Bo, Q. Z. Chen, A cyclometalated iridium(III) complex that induces apoptosis in cisplatin-resistant cancer cells, *Inorganic Chemistry Communications*, 61 (2015) 31-34.
- [6] L. He, M.F. Zhang, Z.Y. Pan, K.N. Wang, Z.J. Zhao, Y. Li, Z.W. Mao, A mitochondria-targeted iridium(iii)-based photoacid generator induces dual-mode photodynamic damage within cancer cells, *Chem Commun*, 55 (2019) 10472-10475.
